# Supplementary material
Source: MDPI journal article supplement (https://www.mdpi.com/2071-1050/15/9/7655)
Supplement: s1 [file s1]

# **Life Cycle Sustainability Assessment of Building Construction: A Case Study in China**

## **Supplementary Material**

**Table S1:** LCA results of the studied building project.

| Approach                  | Impact/Damage Category          | Unit         | Material |          |              | Energy   |          |              | Transportation |          |              | Waste    |          |              | Dust emission |          |              | Total performance |          |              |
|---------------------------|---------------------------------|--------------|----------|----------|--------------|----------|----------|--------------|----------------|----------|--------------|----------|----------|--------------|---------------|----------|--------------|-------------------|----------|--------------|
|                           |                                 |              | Total    | Per unit | Per GFA (m2) | Total    | Per unit | Per GFA (m2) | Total          | Per unit | Per GFA (m2) | Total    | Per unit | Per GFA (m2) | Total         | Per unit | Per GFA (m2) | Total             | Per unit | Per GFA (m2) |
| Midpoint Characterization | Climate change                  | kg CO2 eq    | 1.59E+07 | 7.81E+04 | 4.55E+02     | 2.91E+05 | 1.43E+03 | 8.32E+00     | 1.29E+06       | 6.30E+03 | 3.67E+01     | 1.02E+04 | 5.01E+01 | 2.92E-01     | 0.00E+00      | 0.00E+00 | 0.00E+00     | 1.75E+07          | 8.59E+04 | 5.01E+02     |
|                           | Ozone depletion                 | kg CFC-11 eq | 9.07E-01 | 4.45E-03 | 2.59E-05     | 4.38E-04 | 2.15E-06 | 1.25E-08     | 1.73E-01       | 8.50E-04 | 4.96E-06     | 5.02E-04 | 2.46E-06 | 1.43E-08     | 0.00E+00      | 0.00E+00 | 0.00E+00     | 1.08E+00          | 5.30E-03 | 3.09E-05     |
|                           | Human toxicity                  | kg 1,4-DB eq | 5.94E+06 | 2.91E+04 | 1.70E+02     | 5.24E+04 | 2.57E+02 | 1.50E+00     | 2.08E+05       | 1.02E+03 | 5.95E+00     | 9.61E+03 | 4.71E+01 | 2.75E-01     | 0.00E+00      | 0.00E+00 | 0.00E+00     | 6.21E+06          | 3.04E+04 | 1.77E+02     |
|                           | Photochemical oxidant formation | kg NMVOC     | 4.24E+04 | 2.08E+02 | 1.21E+00     | 1.39E+03 | 6.81E+00 | 3.97E-02     | 3.59E+03       | 1.76E+01 | 1.03E-01     | 2.45E+01 | 1.20E-01 | 7.00E-04     | 0.00E+00      | 0.00E+00 | 0.00E+00     | 4.74E+04          | 2.32E+02 | 1.35E+00     |
|                           | Particulate matter formation    | kg PM10 eq   | 2.92E+04 | 1.43E+02 | 8.34E-01     | 7.62E+02 | 3.74E+00 | 2.18E-02     | 1.19E+03       | 5.84E+00 | 3.40E-02     | 5.77E+00 | 2.83E-02 | 1.65E-04     | 4.14E+02      | 2.03E+00 | 1.18E-02     | 3.16E+04          | 1.55E+02 | 9.02E-01     |

|  |                              |              |          |          |          |          |          |          |          |          |          |          |          |          |          |          |          |          |          |          |
|--|------------------------------|--------------|----------|----------|----------|----------|----------|----------|----------|----------|----------|----------|----------|----------|----------|----------|----------|----------|----------|----------|
|  | Ionizing radiation           | kg U235 eq   | 3.00E+06 | 1.47E+04 | 8.58E+01 | 7.70E+02 | 3.78E+00 | 2.20E-02 | 2.61E+05 | 1.28E+03 | 7.46E+00 | 3.74E+02 | 1.83E+00 | 1.07E-02 | 0.00E+00 | 0.00E+00 | 0.00E+00 | 3.26E+06 | 1.60E+04 | 9.33E+01 |
|  | Terrestrial acidification    | kg SO2 eq    | 4.94E+04 | 2.42E+02 | 1.41E+00 | 2.34E+03 | 1.15E+01 | 6.69E-02 | 3.28E+03 | 1.61E+01 | 9.36E-02 | 1.20E+01 | 5.89E-02 | 3.44E-04 | 0.00E+00 | 0.00E+00 | 0.00E+00 | 5.50E+04 | 2.70E+02 | 1.57E+00 |
|  | Freshwater eutrophication    | kg P eq      | 5.36E+03 | 2.63E+01 | 1.53E-01 | 3.06E+01 | 1.50E-01 | 8.74E-04 | 1.80E+02 | 8.81E-01 | 5.14E-03 | 3.29E-01 | 1.61E-03 | 9.41E-06 | 0.00E+00 | 0.00E+00 | 0.00E+00 | 5.57E+03 | 2.73E+01 | 1.59E-01 |
|  | Marine eutrophication        | kg N eq      | 2.24E+03 | 1.10E+01 | 6.39E-02 | 5.37E+01 | 2.63E-01 | 1.53E-03 | 1.16E+02 | 5.67E-01 | 3.31E-03 | 1.59E+02 | 7.82E-01 | 4.56E-03 | 0.00E+00 | 0.00E+00 | 0.00E+00 | 2.56E+03 | 1.26E+01 | 7.33E-02 |
|  | Terrestrial ecotoxicity      | kg 1,4-DB eq | 1.93E+03 | 9.48E+00 | 5.53E-02 | 5.82E+00 | 2.85E-02 | 1.66E-04 | 1.30E+02 | 6.36E-01 | 3.71E-03 | 2.49E-01 | 1.22E-03 | 7.13E-06 | 0.00E+00 | 0.00E+00 | 0.00E+00 | 2.07E+03 | 1.01E+01 | 5.92E-02 |
|  | Freshwater ecotoxicity       | kg 1,4-DB eq | 1.32E+05 | 6.49E+02 | 3.79E+00 | 7.74E+02 | 3.80E+00 | 2.21E-02 | 4.70E+03 | 2.30E+01 | 1.34E-01 | 7.91E+01 | 3.88E-01 | 2.26E-03 | 0.00E+00 | 0.00E+00 | 0.00E+00 | 1.38E+05 | 6.77E+02 | 3.94E+00 |
|  | Marine ecotoxicity           | kg 1,4-DB eq | 1.37E+05 | 6.71E+02 | 3.91E+00 | 7.74E+02 | 3.79E+00 | 2.21E-02 | 4.89E+03 | 2.40E+01 | 1.40E-01 | 7.14E+01 | 3.50E-01 | 2.04E-03 | 0.00E+00 | 0.00E+00 | 0.00E+00 | 1.43E+05 | 6.99E+02 | 4.07E+00 |
|  | Agricultural land occupation | m2a          | 2.68E+06 | 1.32E+04 | 7.66E+01 | 7.04E+03 | 3.45E+01 | 2.01E-01 | 5.68E+03 | 2.79E+01 | 1.62E-01 | 5.02E+01 | 2.46E-01 | 1.44E-03 | 0.00E+00 | 0.00E+00 | 0.00E+00 | 2.70E+06 | 1.32E+04 | 7.70E+01 |

|                        |                             |           |          |          |          |          |          |          |          |          |          |           |           |           |          |          |          |          |          |          |
|------------------------|-----------------------------|-----------|----------|----------|----------|----------|----------|----------|----------|----------|----------|-----------|-----------|-----------|----------|----------|----------|----------|----------|----------|
|                        | Urban land occupation       | m2a       | 1.12E+05 | 5.47E+02 | 3.19E+00 | 2.05E+03 | 1.01E+01 | 5.87E-02 | 4.35E+04 | 2.13E+02 | 1.24E+00 | 6.07E+02  | 2.97E+00  | 1.73E-02  | 0.00E+00 | 0.00E+00 | 0.00E+00 | 1.58E+05 | 7.74E+02 | 4.51E+00 |
|                        | Natural land transformation | m2        | 2.48E+03 | 1.22E+01 | 7.09E-02 | 3.84E+01 | 1.88E-01 | 1.10E-03 | 4.81E+02 | 2.36E+00 | 1.37E-02 | -7.09E+00 | -3.47E-02 | -2.03E-04 | 0.00E+00 | 0.00E+00 | 0.00E+00 | 2.99E+03 | 1.47E+01 | 8.55E-02 |
|                        | Water depletion             | m3        | 1.58E+05 | 7.73E+02 | 4.51E+00 | 6.83E+02 | 3.35E+00 | 1.95E-02 | 4.63E+03 | 2.27E+01 | 1.32E-01 | 4.67E+01  | 2.29E-01  | 1.33E-03  | 0.00E+00 | 0.00E+00 | 0.00E+00 | 1.63E+05 | 7.99E+02 | 4.66E+00 |
|                        | Metal depletion             | kg Fe eq  | 2.87E+06 | 1.41E+04 | 8.20E+01 | 1.14E+03 | 5.59E+00 | 3.26E-02 | 7.50E+04 | 3.68E+02 | 2.14E+00 | 1.22E+02  | 5.97E-01  | 3.48E-03  | 0.00E+00 | 0.00E+00 | 0.00E+00 | 2.95E+06 | 1.45E+04 | 8.42E+01 |
|                        | Fossil depletion            | kg oil eq | 3.54E+06 | 1.74E+04 | 1.01E+02 | 7.06E+04 | 3.46E+02 | 2.02E+00 | 4.55E+05 | 2.23E+03 | 1.30E+01 | 1.14E+03  | 5.61E+00  | 3.27E-02  | 0.00E+00 | 0.00E+00 | 0.00E+00 | 4.07E+06 | 1.99E+04 | 1.16E+02 |
| Midpoint Normalization | Climate change              | Point     | 2.31E+03 | 1.13E+01 | 6.61E-02 | 4.22E+01 | 2.07E-01 | 1.21E-03 | 1.87E+02 | 9.15E-01 | 5.33E-03 | 1.48E+00  | 7.27E-03  | 4.24E-05  | 0.00E+00 | 0.00E+00 | 0.00E+00 | 2.54E+03 | 1.25E+01 | 7.26E-02 |
|                        | Ozone depletion             | Point     | 2.41E+01 | 1.18E-01 | 6.88E-04 | 1.16E-02 | 5.71E-05 | 3.33E-07 | 4.61E+00 | 2.26E-02 | 1.32E-04 | 1.33E-02  | 6.54E-05  | 3.81E-07  | 0.00E+00 | 0.00E+00 | 0.00E+00 | 2.87E+01 | 1.41E-01 | 8.21E-04 |
|                        | Human toxicity              | Point     | 5.06E+04 | 2.48E+02 | 1.44E+00 | 4.46E+02 | 2.19E+00 | 1.27E-02 | 1.77E+03 | 8.69E+00 | 5.07E-02 | 8.19E+01  | 4.01E-01  | 2.34E-03  | 0.00E+00 | 0.00E+00 | 0.00E+00 | 5.29E+04 | 2.59E+02 | 1.51E+00 |

|  |                                 |       |          |          |          |          |          |          |          |          |          |          |          |          |          |          |          |          |          |          |
|--|---------------------------------|-------|----------|----------|----------|----------|----------|----------|----------|----------|----------|----------|----------|----------|----------|----------|----------|----------|----------|----------|
|  | Photochemical oxidant formation | Point | 8.66E+02 | 4.25E+00 | 2.48E-02 | 2.84E+01 | 1.39E-01 | 8.11E-04 | 7.33E+01 | 3.60E-01 | 2.10E-03 | 5.01E-01 | 2.45E-03 | 1.43E-05 | 0.00E+00 | 0.00E+00 | 0.00E+00 | 9.69E+02 | 4.75E+00 | 2.77E-02 |
|  | Particulate matter formation    | Point | 2.08E+03 | 1.02E+01 | 5.94E-02 | 5.42E+01 | 2.66E-01 | 1.55E-03 | 8.47E+01 | 4.15E-01 | 2.42E-03 | 4.11E-01 | 2.01E-03 | 1.17E-05 | 2.95E+01 | 1.44E-01 | 8.42E-04 | 2.25E+03 | 1.10E+01 | 6.42E-02 |
|  | Ionizing radiation              | Point | 2.28E+03 | 1.12E+01 | 6.52E-02 | 5.86E-01 | 2.87E-03 | 1.67E-05 | 1.99E+02 | 9.73E-01 | 5.67E-03 | 2.84E-01 | 1.39E-03 | 8.12E-06 | 0.00E+00 | 0.00E+00 | 0.00E+00 | 2.48E+03 | 1.22E+01 | 7.09E-02 |
|  | Terrestrial acidification       | Point | 1.29E+03 | 6.34E+00 | 3.69E-02 | 6.13E+01 | 3.00E-01 | 1.75E-03 | 8.58E+01 | 4.21E-01 | 2.45E-03 | 3.15E-01 | 1.54E-03 | 9.00E-06 | 0.00E+00 | 0.00E+00 | 0.00E+00 | 1.44E+03 | 7.06E+00 | 4.12E-02 |
|  | Freshwater eutrophication       | Point | 1.85E+04 | 9.06E+01 | 5.28E-01 | 1.06E+02 | 5.18E-01 | 3.02E-03 | 6.20E+02 | 3.04E+00 | 1.77E-02 | 1.14E+00 | 5.57E-03 | 3.25E-05 | 0.00E+00 | 0.00E+00 | 0.00E+00 | 1.92E+04 | 9.42E+01 | 5.49E-01 |
|  | Marine eutrophication           | Point | 3.05E+02 | 1.49E+00 | 8.71E-03 | 7.32E+00 | 3.59E-02 | 2.09E-04 | 1.58E+01 | 7.73E-02 | 4.51E-04 | 2.17E+01 | 1.07E-01 | 6.21E-04 | 0.00E+00 | 0.00E+00 | 0.00E+00 | 3.50E+02 | 1.71E+00 | 9.99E-03 |
|  | Terrestrial ecotoxicity         | Point | 2.98E+02 | 1.46E+00 | 8.51E-03 | 8.96E-01 | 4.39E-03 | 2.56E-05 | 2.00E+01 | 9.79E-02 | 5.71E-04 | 3.84E-02 | 1.88E-04 | 1.10E-06 | 0.00E+00 | 0.00E+00 | 0.00E+00 | 3.19E+02 | 1.56E+00 | 9.10E-03 |
|  | Freshwater ecotoxicity          | Point | 3.06E+04 | 1.50E+02 | 8.74E-01 | 1.79E+02 | 8.76E-01 | 5.11E-03 | 1.08E+03 | 5.32E+00 | 3.10E-02 | 1.82E+01 | 8.95E-02 | 5.21E-04 | 0.00E+00 | 0.00E+00 | 0.00E+00 | 3.19E+04 | 1.56E+02 | 9.10E-01 |

|                 |                              |       |          |          |          |          |          |          |          |          |          |           |           |           |          |          |          |          |          |          |
|-----------------|------------------------------|-------|----------|----------|----------|----------|----------|----------|----------|----------|----------|-----------|-----------|-----------|----------|----------|----------|----------|----------|----------|
|                 | Marine ecotoxicity           | Point | 5.67E+04 | 2.78E+02 | 1.62E+00 | 3.21E+02 | 1.57E+00 | 9.16E-03 | 2.03E+03 | 9.94E+00 | 5.79E-02 | 2.96E+01  | 1.45E-01  | 8.45E-04  | 0.00E+00 | 0.00E+00 | 0.00E+00 | 5.91E+04 | 2.90E+02 | 1.69E+00 |
|                 | Agricultural land occupation | Point | 4.95E+02 | 2.42E+00 | 1.41E-02 | 1.30E+00 | 6.36E-03 | 3.71E-05 | 1.05E+00 | 5.14E-03 | 2.99E-05 | 9.26E-03  | 4.54E-05  | 2.65E-07  | 0.00E+00 | 0.00E+00 | 0.00E+00 | 4.97E+02 | 2.44E+00 | 1.42E-02 |
|                 | Urban land occupation        | Point | 1.44E+02 | 7.06E-01 | 4.12E-03 | 2.65E+00 | 1.30E-02 | 7.57E-05 | 5.62E+01 | 2.75E-01 | 1.60E-03 | 7.83E-01  | 3.84E-03  | 2.24E-05  | 0.00E+00 | 0.00E+00 | 0.00E+00 | 2.04E+02 | 9.98E-01 | 5.82E-03 |
|                 | Natural land transformation  | Point | 2.06E+02 | 1.01E+00 | 5.89E-03 | 3.19E+00 | 1.56E-02 | 9.12E-05 | 4.00E+01 | 1.96E-01 | 1.14E-03 | -5.89E-01 | -2.89E-03 | -1.68E-05 | 0.00E+00 | 0.00E+00 | 0.00E+00 | 2.49E+02 | 1.22E+00 | 7.11E-03 |
|                 | Water depletion              | Point | 0.00E+00  | 0.00E+00  | 0.00E+00  | 0.00E+00 | 0.00E+00 | 0.00E+00 | 0.00E+00 | 0.00E+00 | 0.00E+00 |
|                 | Metal depletion              | Point | 6.45E+03 | 3.16E+01 | 1.84E-01 | 2.56E+00 | 1.26E-02 | 7.32E-05 | 1.69E+02 | 8.26E-01 | 4.82E-03 | 2.74E-01  | 1.34E-03  | 7.82E-06  | 0.00E+00 | 0.00E+00 | 0.00E+00 | 6.62E+03 | 3.25E+01 | 1.89E-01 |
|                 | Fossil depletion             | Point | 2.58E+03 | 1.26E+01 | 7.37E-02 | 5.14E+01 | 2.52E-01 | 1.47E-03 | 3.31E+02 | 1.62E+00 | 9.46E-03 | 8.33E-01  | 4.08E-03  | 2.38E-05  | 0.00E+00 | 0.00E+00 | 0.00E+00 | 2.96E+03 | 1.45E+01 | 8.46E-02 |
| Endpoint Damage | Climate change Human Health  | DALY  | 2.23E+01 | 1.09E-01 | 6.37E-04 | 4.08E-01 | 2.00E-03 | 1.16E-05 | 1.80E+00 | 8.83E-03 | 5.14E-05 | 1.45E-02  | 7.09E-05  | 4.13E-07  | 0.00E+00 | 0.00E+00 | 0.00E+00 | 2.45E+01 | 1.20E-01 | 7.01E-04 |

|  |                                 |            |          |          |          |          |          |          |          |          |          |          |          |          |          |          |          |          |          |          |
|--|---------------------------------|------------|----------|----------|----------|----------|----------|----------|----------|----------|----------|----------|----------|----------|----------|----------|----------|----------|----------|----------|
|  | Ozone depletion                 | DALY       | 2.36E-03 | 1.16E-05 | 6.76E-08 | 1.17E-06 | 5.73E-09 | 3.34E-11 | 4.55E-04 | 2.23E-06 | 1.30E-08 | 1.32E-06 | 6.48E-09 | 3.77E-11 | 0.00E+00 | 0.00E+00 | 0.00E+00 | 2.82E-03 | 1.38E-05 | 8.06E-08 |
|  | Human toxicity                  | DALY       | 4.15E+00 | 2.04E-02 | 1.19E-04 | 3.66E-02 | 1.80E-04 | 1.05E-06 | 1.46E-01 | 7.14E-04 | 4.16E-06 | 6.73E-03 | 3.30E-05 | 1.92E-07 | 0.00E+00 | 0.00E+00 | 0.00E+00 | 4.34E+00 | 2.13E-02 | 1.24E-04 |
|  | Photochemical oxidant formation | DALY       | 1.65E-03 | 8.11E-06 | 4.73E-08 | 5.42E-05 | 2.66E-07 | 1.55E-09 | 1.40E-04 | 6.86E-07 | 4.00E-09 | 9.56E-07 | 4.69E-09 | 2.73E-11 | 0.00E+00 | 0.00E+00 | 0.00E+00 | 1.85E-03 | 9.06E-06 | 5.28E-08 |
|  | Particulate matter formation    | DALY       | 7.59E+00 | 3.72E-02 | 2.17E-04 | 1.98E-01 | 9.72E-04 | 5.66E-06 | 3.10E-01 | 1.52E-03 | 8.85E-06 | 1.50E-03 | 7.36E-06 | 4.29E-08 | 0.00E+00 | 0.00E+00 | 3.07E-06 | 8.10E+00 | 3.97E-02 | 2.35E-04 |
|  | Ionizing radiation              | DALY       | 4.92E-02 | 2.41E-04 | 1.41E-06 | 1.26E-05 | 6.19E-08 | 3.61E-10 | 4.29E-03 | 2.10E-05 | 1.22E-07 | 6.13E-06 | 3.01E-08 | 1.75E-10 | 0.00E+00 | 0.00E+00 | 0.00E+00 | 5.35E-02 | 2.62E-04 | 1.53E-06 |
|  | Climate change Ecosystems       | species.yr | 1.26E-01 | 6.19E-04 | 3.61E-06 | 2.31E-03 | 1.13E-05 | 6.60E-08 | 1.02E-02 | 5.00E-05 | 2.91E-07 | 8.17E-05 | 4.00E-07 | 2.33E-09 | 0.00E+00 | 0.00E+00 | 0.00E+00 | 1.39E-01 | 6.81E-04 | 3.97E-06 |
|  | Terrestrial acidification       | species.yr | 2.86E-04 | 1.40E-06 | 8.18E-09 | 1.36E-05 | 6.66E-08 | 3.88E-10 | 1.90E-05 | 9.32E-08 | 5.43E-10 | 6.98E-08 | 3.42E-10 | 1.99E-12 | 0.00E+00 | 0.00E+00 | 0.00E+00 | 3.19E-04 | 1.56E-06 | 9.12E-09 |
|  | Freshwater eutrophication       | species.yr | 2.35E-04 | 1.15E-06 | 6.72E-09 | 1.34E-06 | 6.59E-09 | 3.84E-11 | 7.90E-06 | 3.87E-08 | 2.26E-10 | 1.45E-08 | 7.09E-11 | 4.13E-13 | 0.00E+00 | 0.00E+00 | 0.00E+00 | 2.45E-04 | 1.20E-06 | 6.99E-09 |

|  |                              |            |          |          |          |          |          |          |          |          |          |           |           |           |          |          |          |          |          |          |
|--|------------------------------|------------|----------|----------|----------|----------|----------|----------|----------|----------|----------|-----------|-----------|-----------|----------|----------|----------|----------|----------|----------|
|  | Terrestrial ecotoxicity      | species.yr | 2.46E-04 | 1.20E-06 | 7.02E-09 | 7.40E-07 | 3.63E-09 | 2.11E-11 | 1.65E-05 | 8.09E-08 | 4.71E-10 | 3.17E-08  | 1.55E-10  | 9.06E-13  | 0.00E+00 | 0.00E+00 | 0.00E+00 | 2.63E-04 | 1.29E-06 | 7.52E-09 |
|  | Freshwater ecotoxicity       | species.yr | 3.45E-05 | 1.69E-07 | 9.85E-10 | 2.01E-07 | 9.88E-10 | 5.76E-12 | 1.22E-06 | 5.99E-09 | 3.49E-11 | 2.06E-08  | 1.01E-10  | 5.88E-13  | 0.00E+00 | 0.00E+00 | 0.00E+00 | 3.59E-05 | 1.76E-07 | 1.03E-09 |
|  | Marine ecotoxicity           | species.yr | 1.10E-07 | 5.37E-10 | 3.13E-12 | 6.19E-10 | 3.04E-12 | 1.77E-14 | 3.92E-09 | 1.92E-11 | 1.12E-13 | 5.71E-11  | 2.80E-13  | 1.63E-15  | 0.00E+00 | 0.00E+00 | 0.00E+00 | 1.14E-07 | 5.59E-10 | 3.26E-12 |
|  | Agricultural land occupation | species.yr | 3.01E-02 | 1.47E-04 | 8.59E-07 | 7.88E-05 | 3.86E-07 | 2.25E-09 | 6.58E-05 | 3.22E-07 | 1.88E-09 | 6.97E-07  | 3.42E-09  | 1.99E-11  | 0.00E+00 | 0.00E+00 | 0.00E+00 | 3.02E-02 | 1.48E-04 | 8.63E-07 |
|  | Urban land occupation        | species.yr | 2.15E-03 | 1.06E-05 | 6.16E-08 | 3.96E-05 | 1.94E-07 | 1.13E-09 | 8.40E-04 | 4.12E-06 | 2.40E-08 | 1.17E-05  | 5.74E-08  | 3.35E-10  | 0.00E+00 | 0.00E+00 | 0.00E+00 | 3.05E-03 | 1.49E-05 | 8.70E-08 |
|  | Natural land transformation  | species.yr | 3.88E-03 | 1.90E-05 | 1.11E-07 | 6.89E-05 | 3.38E-07 | 1.97E-09 | 7.20E-04 | 3.53E-06 | 2.06E-08 | -1.29E-05 | -6.33E-08 | -3.69E-10 | 0.00E+00 | 0.00E+00 | 0.00E+00 | 4.65E-03 | 2.28E-05 | 1.33E-07 |
|  | Metal depletion              | \$         | 2.05E+05 | 1.01E+03 | 5.87E+00 | 8.16E+01 | 4.00E-01 | 2.33E-03 | 5.36E+03 | 2.63E+01 | 1.53E-01 | 8.72E+00  | 4.27E-02  | 2.49E-04  | 0.00E+00 | 0.00E+00 | 0.00E+00 | 2.11E+05 | 1.03E+03 | 6.02E+00 |
|  | Fossil depletion             | \$         | 5.69E+07 | 2.79E+05 | 1.63E+03 | 1.13E+06 | 5.56E+03 | 3.24E+01 | 7.30E+06 | 3.58E+04 | 2.09E+02 | 1.84E+04  | 9.01E+01  | 5.25E-01  | 0.00E+00 | 0.00E+00 | 0.00E+00 | 6.54E+07 | 3.20E+05 | 1.87E+03 |



|                        |                                 |       |          |          |          |          |          |          |          |          |          |          |          |          |          |          |          |          |          |          |
|------------------------|---------------------------------|-------|----------|----------|----------|----------|----------|----------|----------|----------|----------|----------|----------|----------|----------|----------|----------|----------|----------|----------|
| Endpoint Normalization | Climate change Human Health     | Point | 1.65E+03 | 8.10E+00 | 4.72E-02 | 3.02E+01 | 1.48E-01 | 8.63E-04 | 1.33E+02 | 6.54E-01 | 3.81E-03 | 1.07E+00 | 5.26E-03 | 3.06E-05 | 0.00E+00 | 0.00E+00 | 0.00E+00 | 1.82E+03 | 8.91E+00 | 5.19E-02 |
|                        | Ozone depletion                 | Point | 1.75E-01 | 8.59E-04 | 5.01E-06 | 8.67E-05 | 4.25E-07 | 2.48E-09 | 3.37E-02 | 1.65E-04 | 9.64E-07 | 9.79E-05 | 4.80E-07 | 2.80E-09 | 0.00E+00 | 0.00E+00 | 0.00E+00 | 2.09E-01 | 1.03E-03 | 5.98E-06 |
|                        | Human toxicity                  | Point | 3.08E+02 | 1.51E+00 | 8.80E-03 | 2.71E+00 | 1.33E-02 | 7.76E-05 | 1.08E+01 | 5.29E-02 | 3.09E-04 | 4.99E-01 | 2.44E-03 | 1.42E-05 | 0.00E+00 | 0.00E+00 | 0.00E+00 | 3.22E+02 | 1.58E+00 | 9.20E-03 |
|                        | Photochemical oxidant formation | Point | 1.23E-01 | 6.01E-04 | 3.50E-06 | 4.02E-03 | 1.97E-05 | 1.15E-07 | 1.04E-02 | 5.09E-05 | 2.96E-07 | 7.09E-05 | 3.47E-07 | 2.03E-09 | 0.00E+00 | 0.00E+00 | 0.00E+00 | 1.37E-01 | 6.72E-04 | 3.92E-06 |
|                        | Particulate matter formation    | Point | 5.63E+02 | 2.76E+00 | 1.61E-02 | 1.47E+01 | 7.20E-02 | 4.20E-04 | 2.29E+01 | 1.12E-01 | 6.56E-04 | 1.11E-01 | 5.45E-04 | 3.18E-06 | 0.00E+00 | 0.00E+00 | 2.28E-04 | 6.00E+02 | 2.94E+00 | 1.74E-02 |
|                        | Ionizing radiation              | Point | 3.65E+00 | 1.79E-02 | 1.04E-04 | 9.37E-04 | 4.59E-06 | 2.68E-08 | 3.18E-01 | 1.56E-03 | 9.07E-06 | 4.55E-04 | 2.23E-06 | 1.30E-08 | 0.00E+00 | 0.00E+00 | 0.00E+00 | 3.97E+00 | 1.94E-02 | 1.13E-04 |
|                        | Climate change Ecosystems       | Point | 1.47E+02 | 7.21E-01 | 4.20E-03 | 2.69E+00 | 1.32E-02 | 7.68E-05 | 1.19E+01 | 5.82E-02 | 3.39E-04 | 9.51E-02 | 4.66E-04 | 2.72E-06 | 0.00E+00 | 0.00E+00 | 0.00E+00 | 1.62E+02 | 7.93E-01 | 4.62E-03 |
|                        | Terrestrial acidification       | Point | 3.33E-01 | 1.63E-03 | 9.52E-06 | 1.58E-02 | 7.75E-05 | 4.52E-07 | 2.21E-02 | 1.08E-04 | 6.32E-07 | 8.12E-05 | 3.98E-07 | 2.32E-09 | 0.00E+00 | 0.00E+00 | 0.00E+00 | 3.71E-01 | 1.82E-03 | 1.06E-05 |
|                        |                                 |       |          |          |          |          |          |          |          |          |          |          |          |          |          |          |          |          |          |          |

|  |                              |       |          |          |          |          |          |          |          |          |          |           |           |           |          |          |          |          |          |          |
|--|------------------------------|-------|----------|----------|----------|----------|----------|----------|----------|----------|----------|-----------|-----------|-----------|----------|----------|----------|----------|----------|----------|
|  | Freshwater eutrophication    | Point | 2.74E-01 | 1.34E-03 | 7.83E-06 | 1.57E-03 | 7.67E-06 | 4.47E-08 | 9.19E-03 | 4.51E-05 | 2.63E-07 | 1.68E-05  | 8.26E-08  | 4.81E-10  | 0.00E+00 | 0.00E+00 | 0.00E+00 | 2.85E-01 | 1.40E-03 | 8.14E-06 |
|  | Terrestrial ecotoxicity      | Point | 2.86E-01 | 1.40E-03 | 8.17E-06 | 8.61E-04 | 4.22E-06 | 2.46E-08 | 1.92E-02 | 9.41E-05 | 5.49E-07 | 3.69E-05  | 1.81E-07  | 1.05E-09  | 0.00E+00 | 0.00E+00 | 0.00E+00 | 3.06E-01 | 1.50E-03 | 8.75E-06 |
|  | Freshwater ecotoxicity       | Point | 4.01E-02 | 1.97E-04 | 1.15E-06 | 2.35E-04 | 1.15E-06 | 6.70E-09 | 1.42E-03 | 6.97E-06 | 4.06E-08 | 2.40E-05  | 1.17E-07  | 6.84E-10  | 0.00E+00 | 0.00E+00 | 0.00E+00 | 4.18E-02 | 2.05E-04 | 1.19E-06 |
|  | Marine ecotoxicity           | Point | 1.27E-04 | 6.25E-07 | 3.64E-09 | 7.21E-07 | 3.53E-09 | 2.06E-11 | 4.56E-06 | 2.24E-08 | 1.30E-10 | 6.65E-08  | 3.26E-10  | 1.90E-12  | 0.00E+00 | 0.00E+00 | 0.00E+00 | 1.33E-04 | 6.51E-07 | 3.80E-09 |
|  | Agricultural land occupation | Point | 3.50E+01 | 1.71E-01 | 9.99E-04 | 9.18E-02 | 4.50E-04 | 2.62E-06 | 7.66E-02 | 3.75E-04 | 2.19E-06 | 8.12E-04  | 3.98E-06  | 2.32E-08  | 0.00E+00 | 0.00E+00 | 0.00E+00 | 3.52E+01 | 1.72E-01 | 1.00E-03 |
|  | Urban land occupation        | Point | 2.51E+00 | 1.23E-02 | 7.17E-05 | 4.61E-02 | 2.26E-04 | 1.32E-06 | 9.78E-01 | 4.79E-03 | 2.79E-05 | 1.36E-02  | 6.68E-05  | 3.89E-07  | 0.00E+00 | 0.00E+00 | 0.00E+00 | 3.55E+00 | 1.74E-02 | 1.01E-04 |
|  | Natural land transformation  | Point | 4.51E+00 | 2.21E-02 | 1.29E-04 | 8.02E-02 | 3.93E-04 | 2.29E-06 | 8.38E-01 | 4.11E-03 | 2.39E-05 | -1.50E-02 | -7.37E-05 | -4.30E-07 | 0.00E+00 | 0.00E+00 | 0.00E+00 | 5.41E+00 | 2.65E-02 | 1.55E-04 |
|  | Metal depletion              | Point | 9.29E+00 | 4.55E-02 | 2.65E-04 | 3.69E-03 | 1.81E-05 | 1.05E-07 | 2.42E-01 | 1.19E-03 | 6.93E-06 | 3.94E-04  | 1.93E-06  | 1.13E-08  | 0.00E+00 | 0.00E+00 | 0.00E+00 | 9.53E+00 | 4.67E-02 | 2.72E-04 |

|                    |                                 |       |          |          |          |          |          |          |          |          |          |          |          |          |          |          |          |          |          |          |
|--------------------|---------------------------------|-------|----------|----------|----------|----------|----------|----------|----------|----------|----------|----------|----------|----------|----------|----------|----------|----------|----------|----------|
|                    | Fossil depletion                | Point | 2.57E+03 | 1.26E+01 | 7.35E-02 | 5.13E+01 | 2.52E-01 | 1.47E-03 | 3.30E+02 | 1.62E+00 | 9.43E-03 | 8.31E-01 | 4.07E-03 | 2.37E-05 | 0.00E+00 | 0.00E+00 | 0.00E+00 | 2.96E+03 | 1.45E+01 | 8.45E-02 |
| Endpoint Weighting | Climate change Human Health     | Point | 6.61E+05 | 3.24E+03 | 1.89E+01 | 1.21E+04 | 5.92E+01 | 3.45E-01 | 5.34E+04 | 2.62E+02 | 1.53E+00 | 4.29E+02 | 2.10E+00 | 1.23E-02 | 0.00E+00 | 0.00E+00 | 0.00E+00 | 7.27E+05 | 3.56E+03 | 2.08E+01 |
|                    | Ozone depletion                 | Point | 7.01E+01 | 3.44E-01 | 2.00E-03 | 3.47E-02 | 1.70E-04 | 9.91E-07 | 1.35E+01 | 6.61E-02 | 3.85E-04 | 3.92E-02 | 1.92E-04 | 1.12E-06 | 0.00E+00 | 0.00E+00 | 0.00E+00 | 8.37E+01 | 4.10E-01 | 2.39E-03 |
|                    | Human toxicity                  | Point | 1.23E+05 | 6.04E+02 | 3.52E+00 | 1.09E+03 | 5.32E+00 | 3.10E-02 | 4.32E+03 | 2.12E+01 | 1.23E-01 | 1.99E+02 | 9.78E-01 | 5.70E-03 | 0.00E+00 | 0.00E+00 | 0.00E+00 | 1.29E+05 | 6.31E+02 | 3.68E+00 |
|                    | Photochemical oxidant formation | Point | 4.90E+01 | 2.40E-01 | 1.40E-03 | 1.61E+00 | 7.88E-03 | 4.59E-05 | 4.15E+00 | 2.03E-02 | 1.19E-04 | 2.84E-02 | 1.39E-04 | 8.10E-07 | 0.00E+00 | 0.00E+00 | 0.00E+00 | 5.48E+01 | 2.69E-01 | 1.57E-03 |
|                    | Particulate matter formation    | Point | 2.25E+05 | 1.10E+03 | 6.43E+00 | 5.88E+03 | 2.88E+01 | 1.68E-01 | 9.18E+03 | 4.50E+01 | 2.62E-01 | 4.45E+01 | 2.18E-01 | 1.27E-03 | 0.00E+00 | 0.00E+00 | 9.12E-02 | 2.40E+05 | 1.18E+03 | 6.95E+00 |
|                    | Ionizing radiation              | Point | 1.46E+03 | 7.15E+00 | 4.17E-02 | 3.75E-01 | 1.84E-03 | 1.07E-05 | 1.27E+02 | 6.23E-01 | 3.63E-03 | 1.82E-01 | 8.91E-04 | 5.19E-06 | 0.00E+00 | 0.00E+00 | 0.00E+00 | 1.59E+03 | 7.78E+00 | 4.53E-02 |
|                    | Climate change Ecosystems       | Point | 5.88E+04 | 2.88E+02 | 1.68E+00 | 1.07E+03 | 5.27E+00 | 3.07E-02 | 4.75E+03 | 2.33E+01 | 1.36E-01 | 3.80E+01 | 1.86E-01 | 1.09E-03 | 0.00E+00 | 0.00E+00 | 0.00E+00 | 6.47E+04 | 3.17E+02 | 1.85E+00 |

|  |                              |       |          |          |          |          |          |          |          |          |          |           |           |           |          |          |          |          |          |          |
|--|------------------------------|-------|----------|----------|----------|----------|----------|----------|----------|----------|----------|-----------|-----------|-----------|----------|----------|----------|----------|----------|----------|
|  | Terrestrial acidification    | Point | 1.33E+02 | 6.54E-01 | 3.81E-03 | 6.32E+00 | 3.10E-02 | 1.81E-04 | 8.85E+00 | 4.34E-02 | 2.53E-04 | 3.25E-02  | 1.59E-04  | 9.28E-07  | 0.00E+00 | 0.00E+00 | 0.00E+00 | 1.49E+02 | 7.28E-01 | 4.24E-03 |
|  | Freshwater eutrophication    | Point | 1.10E+02 | 5.37E-01 | 3.13E-03 | 6.26E-01 | 3.07E-03 | 1.79E-05 | 3.68E+00 | 1.80E-02 | 1.05E-04 | 6.74E-03  | 3.30E-05  | 1.93E-07  | 0.00E+00 | 0.00E+00 | 0.00E+00 | 1.14E+02 | 5.58E-01 | 3.25E-03 |
|  | Terrestrial ecotoxicity      | Point | 1.14E+02 | 5.61E-01 | 3.27E-03 | 3.45E-01 | 1.69E-03 | 9.84E-06 | 7.68E+00 | 3.76E-02 | 2.19E-04 | 1.48E-02  | 7.24E-05  | 4.22E-07  | 0.00E+00 | 0.00E+00 | 0.00E+00 | 1.22E+02 | 6.00E-01 | 3.50E-03 |
|  | Freshwater ecotoxicity       | Point | 1.61E+01 | 7.87E-02 | 4.59E-04 | 9.38E-02 | 4.60E-04 | 2.68E-06 | 5.69E-01 | 2.79E-03 | 1.63E-05 | 9.58E-03  | 4.70E-05  | 2.74E-07  | 0.00E+00 | 0.00E+00 | 0.00E+00 | 1.67E+01 | 8.20E-02 | 4.78E-04 |
|  | Marine ecotoxicity           | Point | 5.10E-02 | 2.50E-04 | 1.46E-06 | 2.88E-04 | 1.41E-06 | 8.24E-09 | 1.82E-03 | 8.94E-06 | 5.21E-08 | 2.66E-05  | 1.30E-07  | 7.60E-10  | 0.00E+00 | 0.00E+00 | 0.00E+00 | 5.31E-02 | 2.60E-04 | 1.52E-06 |
|  | Agricultural land occupation | Point | 1.40E+04 | 6.86E+01 | 4.00E-01 | 3.67E+01 | 1.80E-01 | 1.05E-03 | 3.06E+01 | 1.50E-01 | 8.75E-04 | 3.25E-01  | 1.59E-03  | 9.28E-06  | 0.00E+00 | 0.00E+00 | 0.00E+00 | 1.41E+04 | 6.89E+01 | 4.02E-01 |
|  | Urban land occupation        | Point | 1.00E+03 | 4.92E+00 | 2.87E-02 | 1.84E+01 | 9.04E-02 | 5.27E-04 | 3.91E+02 | 1.92E+00 | 1.12E-02 | 5.45E+00  | 2.67E-02  | 1.56E-04  | 0.00E+00 | 0.00E+00 | 0.00E+00 | 1.42E+03 | 6.95E+00 | 4.05E-02 |
|  | Natural land transformation  | Point | 1.80E+03 | 8.85E+00 | 5.16E-02 | 3.21E+01 | 1.57E-01 | 9.17E-04 | 3.35E+02 | 1.64E+00 | 9.58E-03 | -6.01E+00 | -2.95E-02 | -1.72E-04 | 0.00E+00 | 0.00E+00 | 0.00E+00 | 2.17E+03 | 1.06E+01 | 6.19E-02 |

|               |                  |            |          |          |          |          |          |          |          |          |          |          |          |          |          |          |          |          |          |          |
|---------------|------------------|------------|----------|----------|----------|----------|----------|----------|----------|----------|----------|----------|----------|----------|----------|----------|----------|----------|----------|----------|
|               | Metal depletion  | Point      | 1.86E+03 | 9.10E+00 | 5.31E-02 | 7.38E-01 | 3.62E-03 | 2.11E-05 | 4.85E+01 | 2.38E-01 | 1.39E-03 | 7.88E-02 | 3.86E-04 | 2.25E-06 | 0.00E+00 | 0.00E+00 | 0.00E+00 | 1.91E+03 | 9.35E+00 | 5.45E-02 |
|               | Fossil depletion | Point      | 5.15E+05 | 2.52E+03 | 1.47E+01 | 1.03E+04 | 5.03E+01 | 2.93E-01 | 6.60E+04 | 3.24E+02 | 1.89E+00 | 1.66E+02 | 8.15E-01 | 4.75E-03 | 0.00E+00 | 0.00E+00 | 0.00E+00 | 5.91E+05 | 2.90E+03 | 1.69E+01 |
| Damage        | Human Health     | DALY       | 3.41E+01 | 1.67E-01 | 9.74E-04 | 6.43E-01 | 3.15E-03 | 1.84E-05 | 2.26E+00 | 1.11E-02 | 6.46E-05 | 2.27E-02 | 1.11E-04 | 6.49E-07 | 0.00E+00 | 0.00E+00 | 3.07E-06 | 3.70E+01 | 1.82E-01 | 1.06E-03 |
|               | Ecosystems       | species.yr | 1.63E-01 | 8.00E-04 | 4.66E-06 | 2.51E-03 | 1.23E-05 | 7.18E-08 | 1.19E-02 | 5.82E-05 | 3.39E-07 | 8.13E-05 | 3.99E-07 | 2.32E-09 | 0.00E+00 | 0.00E+00 | 0.00E+00 | 1.78E-01 | 8.71E-04 | 5.08E-06 |
|               | Resources        | \$         | 5.71E+07 | 2.80E+05 | 1.63E+03 | 1.13E+06 | 5.56E+03 | 3.24E+01 | 7.31E+06 | 3.58E+04 | 2.09E+02 | 1.84E+04 | 9.01E+01 | 5.25E-01 | 0.00E+00 | 0.00E+00 | 0.00E+00 | 6.56E+07 | 3.21E+05 | 1.87E+03 |
| Normalization | Human Health     | Point      | 2.53E+03 | 1.24E+01 | 7.22E-02 | 4.76E+01 | 2.33E-01 | 1.36E-03 | 1.68E+02 | 8.21E-01 | 4.79E-03 | 1.68E+00 | 8.25E-03 | 4.81E-05 | 0.00E+00 | 0.00E+00 | 2.28E-04 | 2.74E+03 | 1.35E+01 | 7.86E-02 |
|               | Ecosystems       | Point      | 1.90E+02 | 9.31E-01 | 5.43E-03 | 2.92E+00 | 1.43E-02 | 8.35E-05 | 1.38E+01 | 6.77E-02 | 3.95E-04 | 9.46E-02 | 4.64E-04 | 2.70E-06 | 0.00E+00 | 0.00E+00 | 0.00E+00 | 2.07E+02 | 1.01E+00 | 5.91E-03 |
|               | Resources        | Point      | 2.58E+03 | 1.27E+01 | 7.38E-02 | 5.13E+01 | 2.52E-01 | 1.47E-03 | 3.30E+02 | 1.62E+00 | 9.44E-03 | 8.31E-01 | 4.08E-03 | 2.38E-05 | 0.00E+00 | 0.00E+00 | 0.00E+00 | 2.97E+03 | 1.45E+01 | 8.47E-02 |

|           |              |       |          |          |          |          |          |          |          |          |          |          |          |          |          |          |          |          |          |          |
|-----------|--------------|-------|----------|----------|----------|----------|----------|----------|----------|----------|----------|----------|----------|----------|----------|----------|----------|----------|----------|----------|
| Weighting | Human Health | Point | 1.01E+06 | 4.96E+03 | 2.89E+01 | 1.90E+04 | 9.34E+01 | 5.44E-01 | 6.70E+04 | 3.29E+02 | 1.91E+00 | 6.73E+02 | 3.30E+00 | 1.92E-02 | 0.00E+00 | 0.00E+00 | 9.12E-02 | 1.10E+06 | 5.38E+03 | 3.15E+01 |
|           | Ecosystems   | Point | 7.60E+04 | 3.73E+02 | 2.17E+00 | 1.17E+03 | 5.73E+00 | 3.34E-02 | 5.53E+03 | 2.71E+01 | 1.58E-01 | 3.79E+01 | 1.86E-01 | 1.08E-03 | 0.00E+00 | 0.00E+00 | 0.00E+00 | 8.27E+04 | 4.06E+02 | 2.36E+00 |
|           | Resources    | Point | 5.17E+05 | 2.53E+03 | 1.48E+01 | 1.03E+04 | 5.03E+01 | 2.93E-01 | 6.61E+04 | 3.24E+02 | 1.89E+00 | 1.66E+02 | 8.15E-01 | 4.75E-03 | 0.00E+00 | 0.00E+00 | 0.00E+00 | 5.93E+05 | 2.91E+03 | 1.69E+01 |

**Table S2:** S-LCA characterization results of the studied building project.

| Stakeholder     | Impact category                                           | Resource  | Material  | Construction | Total     |
|-----------------|-----------------------------------------------------------|-----------|-----------|--------------|-----------|
| Worker          | 1 Freedom of association and collective bargaining        | -3.90E-03 | -8.37E-01 | 0.00E+00     | -8.41E-01 |
|                 | 2 Child labor                                             | 2.07E-03  | 4.44E-01  | 0.00E+00     | 4.46E-01  |
|                 | 3 Fair salary                                             | 3.90E-03  | 8.37E-01  | -1.27E-02    | 8.29E-01  |
|                 | 4 Working hours                                           | 3.90E-03  | 8.37E-01  | -2.54E-02    | 8.16E-01  |
|                 | 5 Forced labors                                           | -1.29E-03 | -2.76E-01 | -2.54E-02    | -3.03E-01 |
|                 | 6 Equal opportunities/discrimination                      | 7.80E-04  | 1.67E-01  | -1.27E-02    | 1.56E-01  |
|                 | 7 Health and safety                                       | 2.30E-03  | 4.94E-01  | 2.16E-01     | 7.12E-01  |
| Local Community | 8 Access to material resources (e.g., sanitation, school) | 1.17E-03  | 2.51E-01  | 1.27E-02     | 2.65E-01  |
|                 | 9 Cultural heritages                                      | 0.00E+00  | 0.00E+00  | 2.54E-02     | 2.54E-02  |
|                 | 10 Safe/healthy living conditions                         | 6.50E-04  | 1.40E-01  | 2.67E-01     | 4.07E-01  |
|                 | 11 Community engagement                                   | 3.90E-04  | 8.37E-02  | 1.52E-01     | 2.36E-01  |
|                 | 12 Local employment                                       | 3.55E-03  | 7.62E-01  | 8.89E-02     | 8.54E-01  |
| Society         | 13 Public commitments to sustainability issues            | 0.00E+00  | 0.00E+00  | 2.79E-01     | 2.79E-01  |
